# Supplementary material
Source: PubMed Central journal article supplement (PMC9559775)
Supplement: JSLHR-65-1906-s002.pdf [file JSLHR-65-1906-s002.pdf]

**Supplemental Material S2.** Multiple imputation mixed-effects model results.

| <b>Condition</b>                              | <b>Predictor</b>                    | <b><i>b</i> estimate</b> | <b>test-statistic</b> | <b><i>p</i></b>    |
|-----------------------------------------------|-------------------------------------|--------------------------|-----------------------|--------------------|
| <b>Verbal-within vs Nonverbal-within</b>      |                                     |                          |                       |                    |
| Accuracy                                      |                                     |                          |                       |                    |
|                                               | Condition                           | -0.39                    | -0.99                 | <i>p</i> = .32     |
|                                               | Group                               | -1.87                    | -3.51                 | <i>p</i> < .001*** |
|                                               | SES                                 | 0.01                     | 0.12                  | <i>p</i> = .91     |
|                                               | Verbal-within interference accuracy | 0.57                     | 0.99                  | <i>p</i> = .33     |
|                                               | Group × Condition                   | 0.64                     | 1.07                  | <i>p</i> = .29     |
| Reaction Time                                 |                                     |                          |                       |                    |
|                                               | Condition                           | -28.90                   | 0.30                  | <i>p</i> = .76     |
|                                               | Group                               | 208.06                   | 1.54                  | <i>p</i> = .12     |
|                                               | SES                                 | -10.70                   | -0.43                 | <i>p</i> = .67     |
|                                               | Group × Condition                   | 7.61                     | 0.05                  | <i>p</i> = .96     |
| <b>Verbal-within vs. Verbal-divided</b>       |                                     |                          |                       |                    |
| Accuracy                                      |                                     |                          |                       |                    |
|                                               | Condition                           | 0.24                     | 0.80                  | <i>p</i> = .42     |
|                                               | Group                               | -2.03                    | -3.77                 | <i>p</i> < .001*** |
|                                               | SES                                 | -0.10                    | -1.02                 | <i>p</i> = .31     |
|                                               | Verbal-within interference accuracy | 0.37                     | 0.65                  | <i>p</i> = .52     |
|                                               | Group × Condition                   | 0.42                     | 0.97                  | <i>p</i> = .33     |
| Reaction Time                                 |                                     |                          |                       |                    |
|                                               | Condition                           | -180.54                  | -2.38                 | <i>p</i> < .05*    |
|                                               | Group                               | 224.96                   | 1.66                  | <i>p</i> = .10     |
|                                               | SES                                 | -1.01                    | -0.04                 | <i>p</i> = .97     |
|                                               | Group × Condition                   | -26.94                   | -0.21                 | <i>p</i> = .83     |
| <b>Nonverbal-within vs. Nonverbal-divided</b> |                                     |                          |                       |                    |
| Accuracy                                      |                                     |                          |                       |                    |
|                                               | Condition                           | 0.68                     | 2.02                  | <i>p</i> < .05*    |
|                                               | Group                               | -1.19                    | -2.48                 | <i>p</i> < .05*    |
|                                               | SES                                 | 0.05                     | 0.49                  | <i>p</i> = .62     |

|                                              |                                         |         |       |                    |
|----------------------------------------------|-----------------------------------------|---------|-------|--------------------|
|                                              | Group × Condition                       | -0.74   | -1.52 | <i>p</i> = .13     |
| <b>Reaction Time</b>                         |                                         |         |       |                    |
|                                              | Condition                               | 442.57  | 4.51  | <i>p</i> < .001*** |
|                                              | Group                                   | 355.45  | 2.27  | <i>p</i> < .05*    |
|                                              | SES                                     | 24.46   | 0.77  | <i>p</i> = .44     |
|                                              | Nonverbal-divided<br>interference RT    | 0.47    | 2.27  | <i>p</i> < .05*    |
|                                              | Group × Condition                       | 5.86    | 0.04  | <i>p</i> = .97     |
| <b>Verbal-divided vs.<br/>Distributed</b>    |                                         |         |       |                    |
| Accuracy                                     |                                         |         |       |                    |
|                                              | Condition                               | -0.53   | -1.50 | <i>p</i> = .13     |
|                                              | Group                                   | -1.44   | -3.05 | <i>p</i> < .01**   |
|                                              | SES                                     | -0.01   | -0.09 | <i>p</i> = .93     |
|                                              | Distributed<br>interference<br>accuracy | 1.39    | 1.94  | <i>p</i> = .06     |
|                                              | Group × Condition                       | 0.46    | 0.86  | <i>p</i> = .39     |
| <b>Reaction Time</b>                         |                                         |         |       |                    |
|                                              | Condition                               | 314.81  | 3.36  | <i>p</i> < .001*** |
|                                              | Group                                   | 212.00  | 1.72  | <i>p</i> = .09     |
|                                              | SES                                     | 14.29   | 0.57  | <i>p</i> = .57     |
|                                              | Group × Condition                       | 215.09  | 1.40  | <i>p</i> = .16     |
| <b>Nonverbal-divided<br/>vs. Distributed</b> |                                         |         |       |                    |
| Accuracy                                     |                                         |         |       |                    |
|                                              | Condition                               | -0.54   | -1.89 | <i>p</i> = .06     |
|                                              | Group                                   | -1.81   | -3.23 | <i>p</i> < .01**   |
|                                              | SES                                     | 0.03    | 0.27  | <i>p</i> = .79     |
|                                              | Distributed<br>interference<br>accuracy | 2.26    | 3.18  | <i>p</i> < .01**   |
|                                              | Group × Condition                       | 0.94    | 2.33  | <i>p</i> < .05*    |
| DLD Group                                    | Condition                               | 0.57    | 6.22  | <i>p</i> < .001*** |
| TD Group                                     | Condition                               |         |       | <i>p</i> = .10     |
| <b>Reaction Time</b>                         |                                         |         |       |                    |
|                                              | Condition                               | -247.34 | -2.27 | <i>p</i> < .05*    |
|                                              | Group                                   | 414.25  | 1.88  | <i>p</i> = .06     |
|                                              | SES                                     | 22.48   | 0.60  | <i>p</i> = .55     |

|                                      |       |      |             |
|--------------------------------------|-------|------|-------------|
| Nonverbal-divided<br>interference RT | 0.49  | 2.02 | $p < .05^*$ |
| Group $\times$ Condition             | 87.34 | 0.51 | $p = .61$   |

---

*Note.* Test-statistic = chi-sq for accuracy and t-value for reaction time; Group = Typically Developing vs. Developmental Language Disorder group comparison; Sentence Comprehension = Accuracy on the sentence comprehension task; SES = socioeconomic status; NS = not significant; Matrix Reasoning = *t*-score on the Matrix Reasoning subscale from the Wechsler Abbreviated Intelligence Scale, Second Edition (WASI-II); \*significant difference at  $p < .05$ ; \*\*significant difference at  $p < .01$ ; \*\*\* significant difference at  $p < .001$ .
